# Supplementary material
Source: ML conference proceedings conference paper supplement (https://openreview.net/forum?id=jMhRbV47pS)

1 layer, 1 head

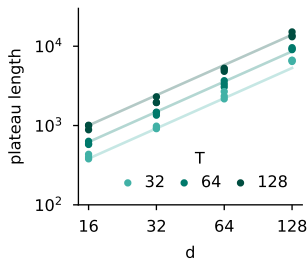

1 layer, 2 heads

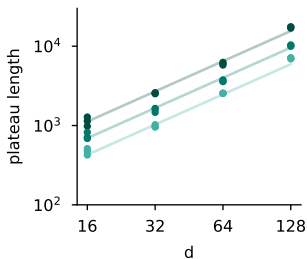

1 layer, 4 heads

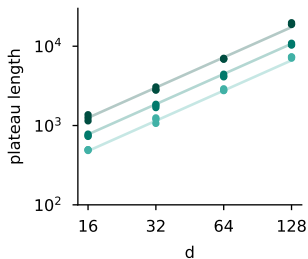

2 layers, 1 head

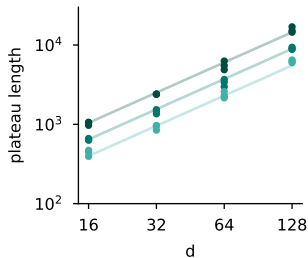

2 layers, 2 heads

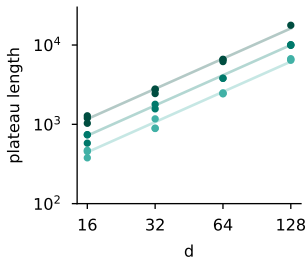

2 layers, 4 heads

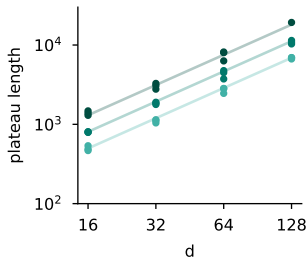

4 layers, 1 head

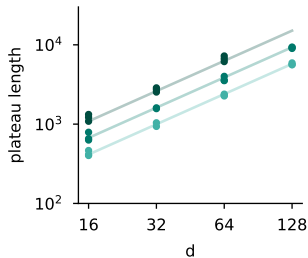

4 layers, 2 heads

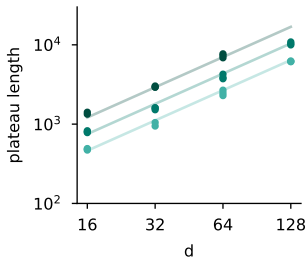

4 layers, 4 heads

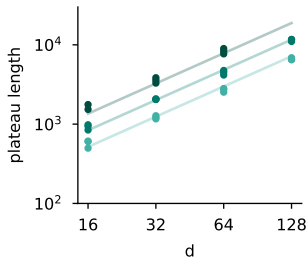

Supplement: supplementary_material [file appendix_scaling_law_transformer_layers_head.pdf › SI_emergence_sparse_attention/code/figures/generated_figures/appendix_scaling_law_transformer_layers_head.pdf]
