# Supplementary material
Source: ML conference proceedings conference paper supplement (https://openreview.net/forum?id=jMhRbV47pS)

relevant token feature  
random relevant token position

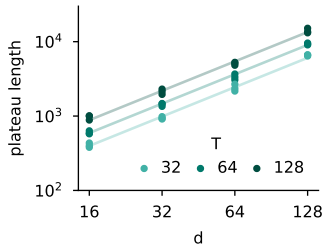

relevant token feature  
fixed relevant token position

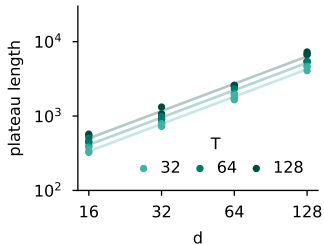

no relevant token feature  
fixed relevant token position

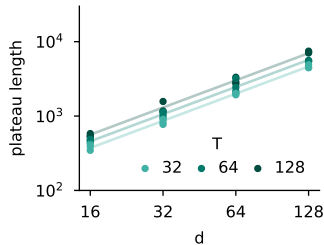

Supplement: supplementary_material [file appendix_scaling_law_transformer_variation_task.pdf › SI_emergence_sparse_attention/code/figures/generated_figures/appendix_scaling_law_transformer_variation_task.pdf]
