# Supplementary material
Source: ML conference proceedings conference paper supplement (https://openreview.net/forum?id=jMhRbV47pS)

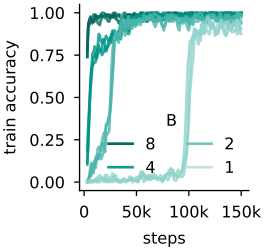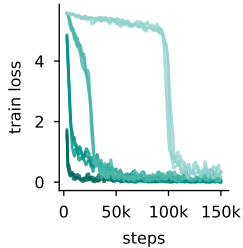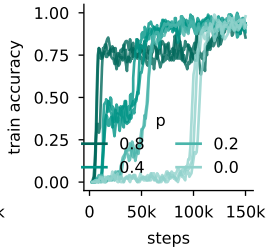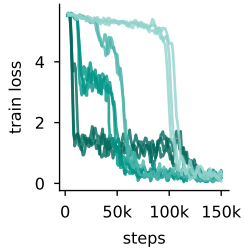

Supplement: supplementary_material [file app_associative_recall_repetition_train.pdf › SI_emergence_sparse_attention/code/figures/generated_figures/app_associative_recall_repetition_train.pdf]

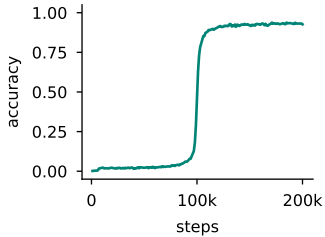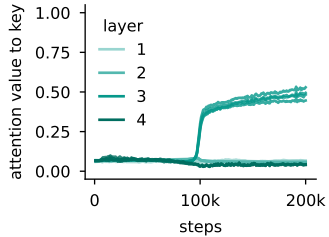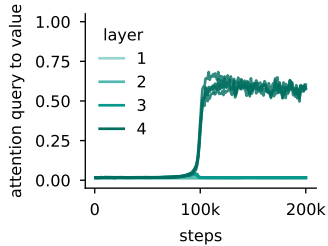

Supplement: supplementary_material [file appendix_associative_recall_attention_weights.pdf › SI_emergence_sparse_attention/code/figures/generated_figures/appendix_associative_recall_attention_weights.pdf]

$d = 32$ 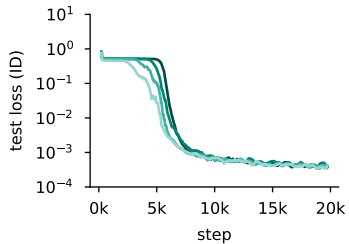 $d = 64$ 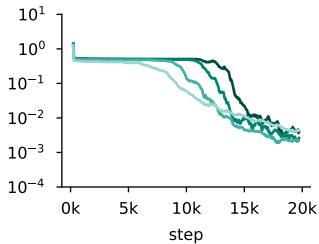 $d = 128$ 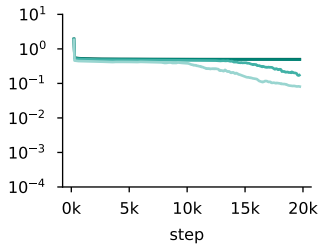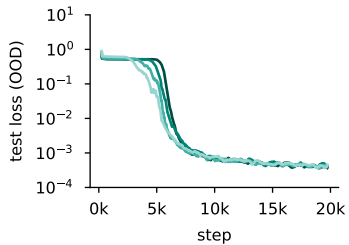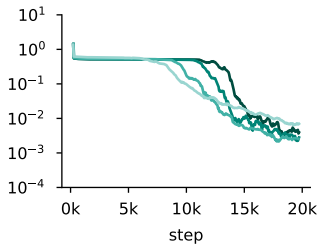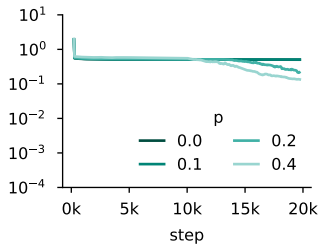

Supplement: supplementary_material [file appendix_dynamics_repetition.pdf › SI_emergence_sparse_attention/code/figures/generated_figures/appendix_dynamics_repetition.pdf]

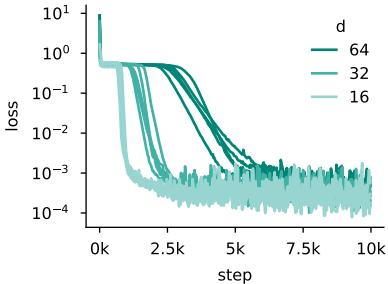

Supplement: supplementary_material [file appendix_dynamics_transformer.pdf › SI_emergence_sparse_attention/code/figures/generated_figures/appendix_dynamics_transformer.pdf]

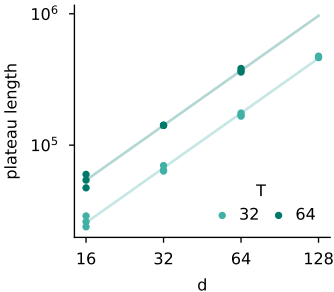

Supplement: supplementary_material [file appendix_scaling_law_sgd.pdf › SI_emergence_sparse_attention/code/figures/generated_figures/appendix_scaling_law_sgd.pdf]

SGD

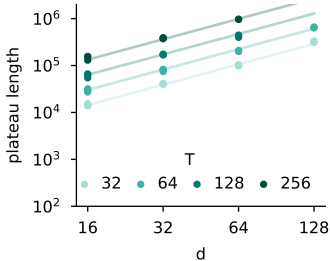

Adam

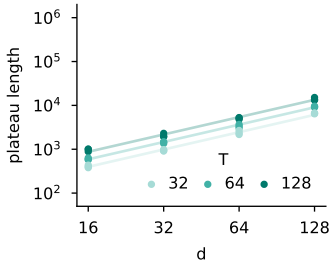

Supplement: supplementary_material [file appendix_scaling_law_sgd_vs_adam.pdf › SI_emergence_sparse_attention/code/figures/generated_figures/appendix_scaling_law_sgd_vs_adam.pdf]

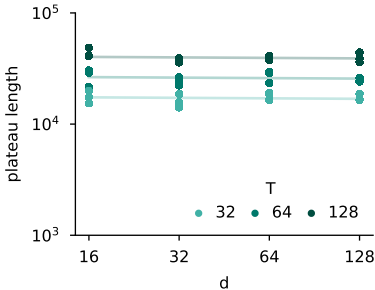

Supplement: supplementary_material [file appendix_scaling_law_transformer_same_emb_dim.pdf › SI_emergence_sparse_attention/code/figures/generated_figures/appendix_scaling_law_transformer_same_emb_dim.pdf]

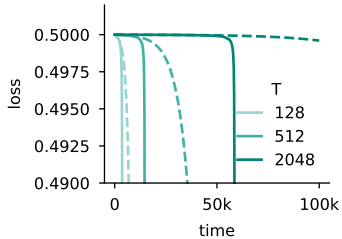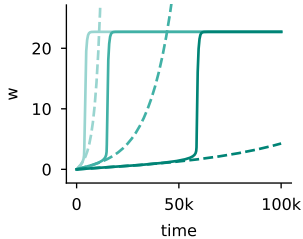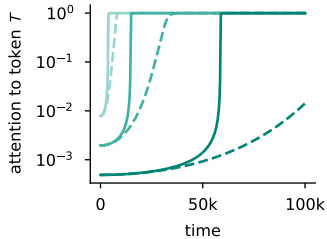

Supplement: supplementary_material [file appendix_theory_comparison_early.pdf › SI_emergence_sparse_attention/code/figures/generated_figures/appendix_theory_comparison_early.pdf]

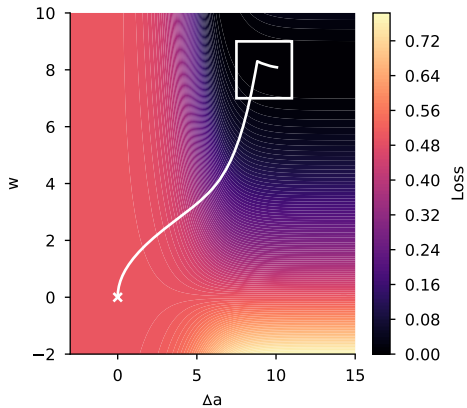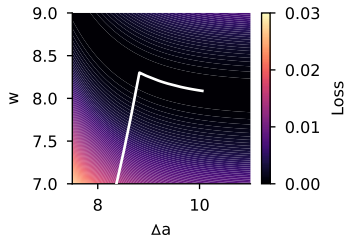

Supplement: supplementary_material [file appendix_theory_loss_surface.pdf › SI_emergence_sparse_attention/code/figures/generated_figures/appendix_theory_loss_surface.pdf]

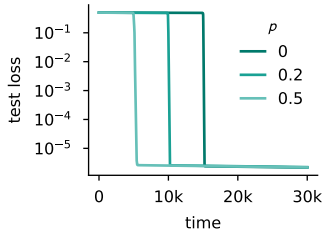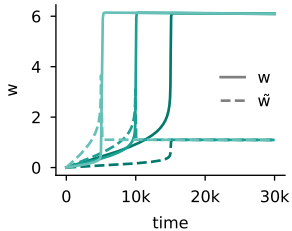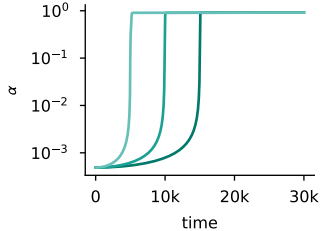

Supplement: supplementary_material [file appendix_theory_repetition_dynamics.pdf › SI_emergence_sparse_attention/code/figures/generated_figures/appendix_theory_repetition_dynamics.pdf]

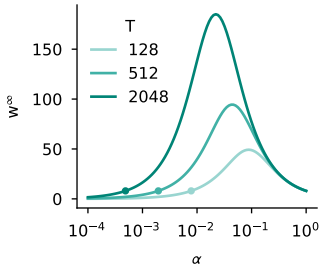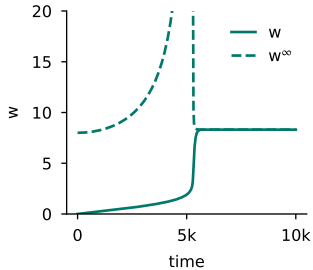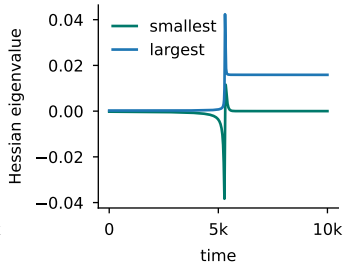

Supplement: supplementary_material [file appendix_theory_w_inf_hessian.pdf › SI_emergence_sparse_attention/code/figures/generated_figures/appendix_theory_w_inf_hessian.pdf]

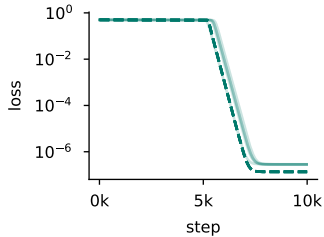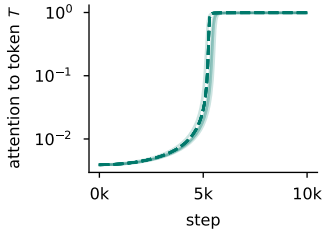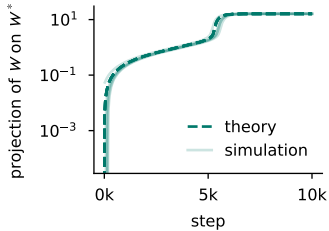

Supplement: supplementary_material [file appendix_validation_dynamics_no_repetition.pdf › SI_emergence_sparse_attention/code/figures/generated_figures/appendix_validation_dynamics_no_repetition.pdf]

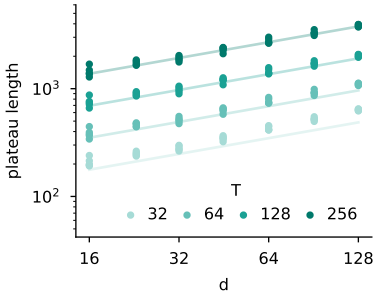

Supplement: supplementary_material [file appendix_validation_scaling_law_no_repetition.pdf › SI_emergence_sparse_attention/code/figures/generated_figures/appendix_validation_scaling_law_no_repetition.pdf]

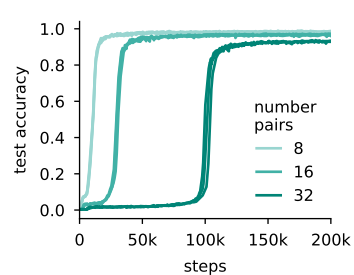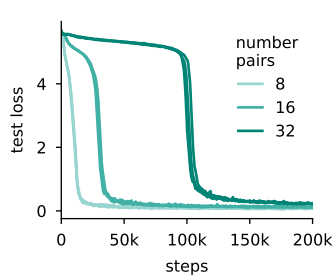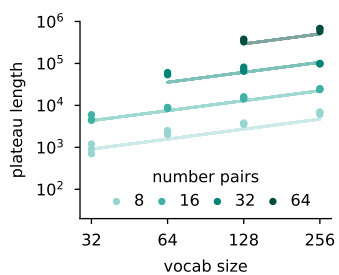

Supplement: supplementary_material [file associative_recall_base.pdf › SI_emergence_sparse_attention/code/figures/generated_figures/associative_recall_base.pdf]

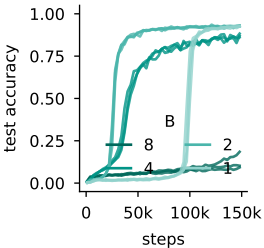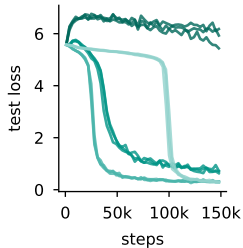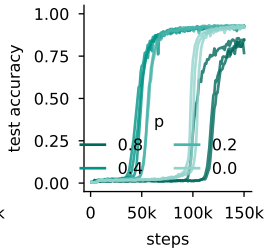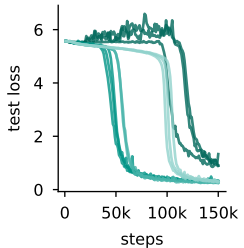

Supplement: supplementary_material [file associative_recall_repetition.pdf › SI_emergence_sparse_attention/code/figures/generated_figures/associative_recall_repetition.pdf]

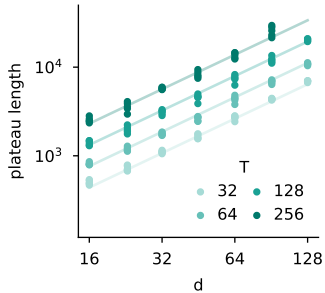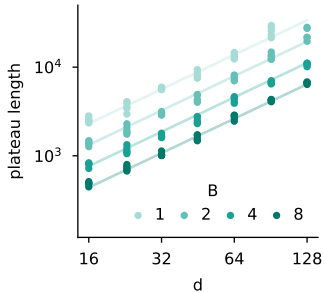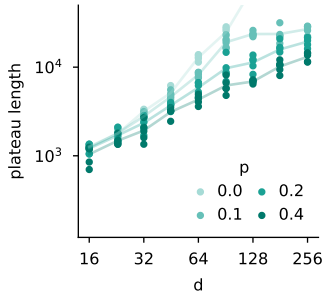

Supplement: supplementary_material [file scaling_law_real_transformer.pdf › SI_emergence_sparse_attention/code/figures/generated_figures/scaling_law_real_transformer.pdf]

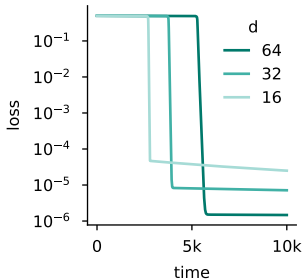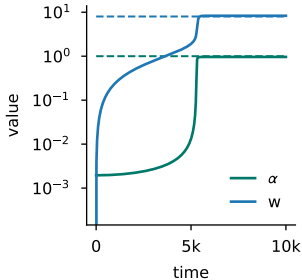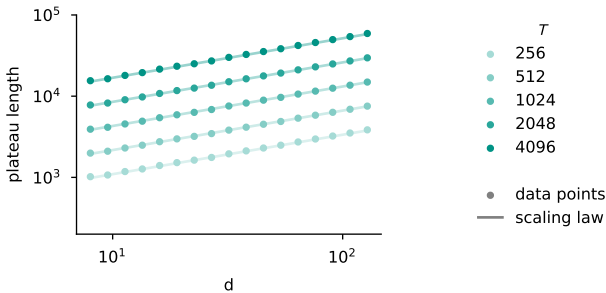

Supplement: supplementary_material [file theory_no_repetition.pdf › SI_emergence_sparse_attention/code/figures/generated_figures/theory_no_repetition.pdf]

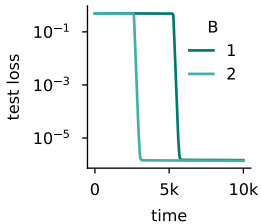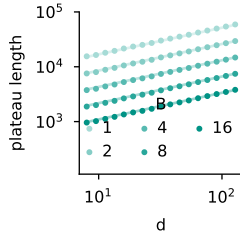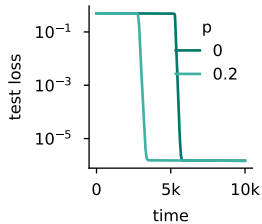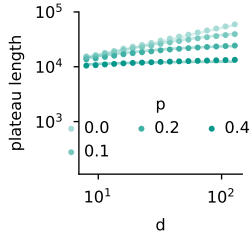

Supplement: supplementary_material [file theory_repetition.pdf › SI_emergence_sparse_attention/code/figures/generated_figures/theory_repetition.pdf]
